# Supplementary material for: Dissection of Factors Affecting the Variability of the Peptide Bond Geometry and Planarity
Source: Hindawi journal article supplement (doi:10.1155/2017/2617629), 2017-01-01
Supplement: f1 [file 2617629.f1.pdf]

## Supplementary Material

*Table S1. Statistical parameters derived from the linear fitting of the graphs reported in Figure 2 by considering  $\beta$ -sheet and  $\alpha$ -helix structures separately. For parameters with  $R < 0.70$  the p-value has been calculated and reported in bracket.*

| Parameter                                                          | $\beta$ -sheet            |                 | $\alpha$ -helix           |                 |
|--------------------------------------------------------------------|---------------------------|-----------------|---------------------------|-----------------|
|                                                                    | Correlation coefficient R | Regression line | Correlation coefficient R | Regression line |
| NC <sup><math>\alpha</math></sup> C                                | 0.88                      | y=0.81x+21.1    | 0.89                      | y=0.49x+57.7    |
| NC <sup><math>\alpha</math></sup> C <sup><math>\beta</math></sup>  | 0.76                      | y=0.78x+24.7    | 0.25 (0.0055)             | y=0.25x+83.2    |
| C <sup><math>\beta</math></sup> C <sup><math>\alpha</math></sup> C | 0.93                      | y=0.84x+17.8    | 0.80                      | y=0.59x+44.7    |
| C <sup><math>\alpha</math></sup> CO                                | 0.87                      | y=0.80x+24.3    | 0.89                      | y=0.66x+41.0    |
| C <sup><math>\alpha</math></sup> CN <sup>+1</sup>                  | 0.84                      | y=0.69x+36.2    | 0.82                      | y=0.82x+21.1    |
| OCN <sup>+1</sup>                                                  | 0.72                      | y=0.63x+45.9    | 0.10 (0.25)               | y=0.076x+113.5  |
| C <sup>-1</sup> NC <sup><math>\alpha</math></sup>                  | 0.78                      | y=0.71x+35.5    | 0.76                      | y=0.75x+30.9    |
| $\Delta\omega$                                                     | 0.92                      | y=0.87x+0.92    | 0.71                      | y=0.41x+1.2     |
| $\theta_C$                                                         | 0.94                      | y=0.85x-0.15    | 0.77                      | y=0.62x+0.68    |

*Table S2. Engl and Huber parameters for different backbone dihedral angles. The number reported in the second row is the standard deviation.*

| Angle           | NC <sup><math>\alpha</math></sup> C | C <sup><math>\alpha</math></sup> CO | C <sup><math>\alpha</math></sup> CN <sup>+1</sup> | OCN <sup>+1</sup> | C <sup>-1</sup> NC <sup><math>\alpha</math></sup> | NC <sup><math>\alpha</math></sup> C <sup><math>\beta</math></sup> | C <sup><math>\beta</math></sup> C <sup><math>\alpha</math></sup> C |
|-----------------|-------------------------------------|-------------------------------------|---------------------------------------------------|-------------------|---------------------------------------------------|-------------------------------------------------------------------|--------------------------------------------------------------------|
| Residue         |                                     |                                     |                                                   |                   |                                                   |                                                                   |                                                                    |
| Pro             | 111.8<br>2.5                        | -                                   | 116.9<br>1.5                                      | 122.0<br>1.4      | 122.6<br>5.0                                      | 103.0<br>1.1                                                      | -                                                                  |
| Non-Pro         | -                                   | -                                   | -                                                 | 123.0<br>1.6      | -                                                 | -                                                                 | -                                                                  |
| Gly             | 112.5<br>2.9                        | 120.8<br>2.1                        | 116.4<br>2.1                                      | -                 | 120.6<br>1.7                                      | -                                                                 | -                                                                  |
| Non-Gly         | -                                   | 120.8<br>1.7                        | -                                                 | -                 | -                                                 | -                                                                 | -                                                                  |
| Ala             | -                                   | -                                   | -                                                 | -                 | -                                                 | 110.4<br>1.5                                                      | 110.5<br>1.5                                                       |
| Ile, Thr, Val   | -                                   | -                                   | -                                                 | -                 | -                                                 | 111.5<br>1.7                                                      | 109.1<br>2.2                                                       |
| Non-Gly/non-Pro | 111.2<br>2.8                        | -                                   | 116.2<br>2.0                                      | -                 | 121.7<br>1.8                                      | -                                                                 | -                                                                  |
| The rest        | -                                   | -                                   | -                                                 |                   | -                                                 | 110.5<br>1.7                                                      | 110.1<br>1.9                                                       |

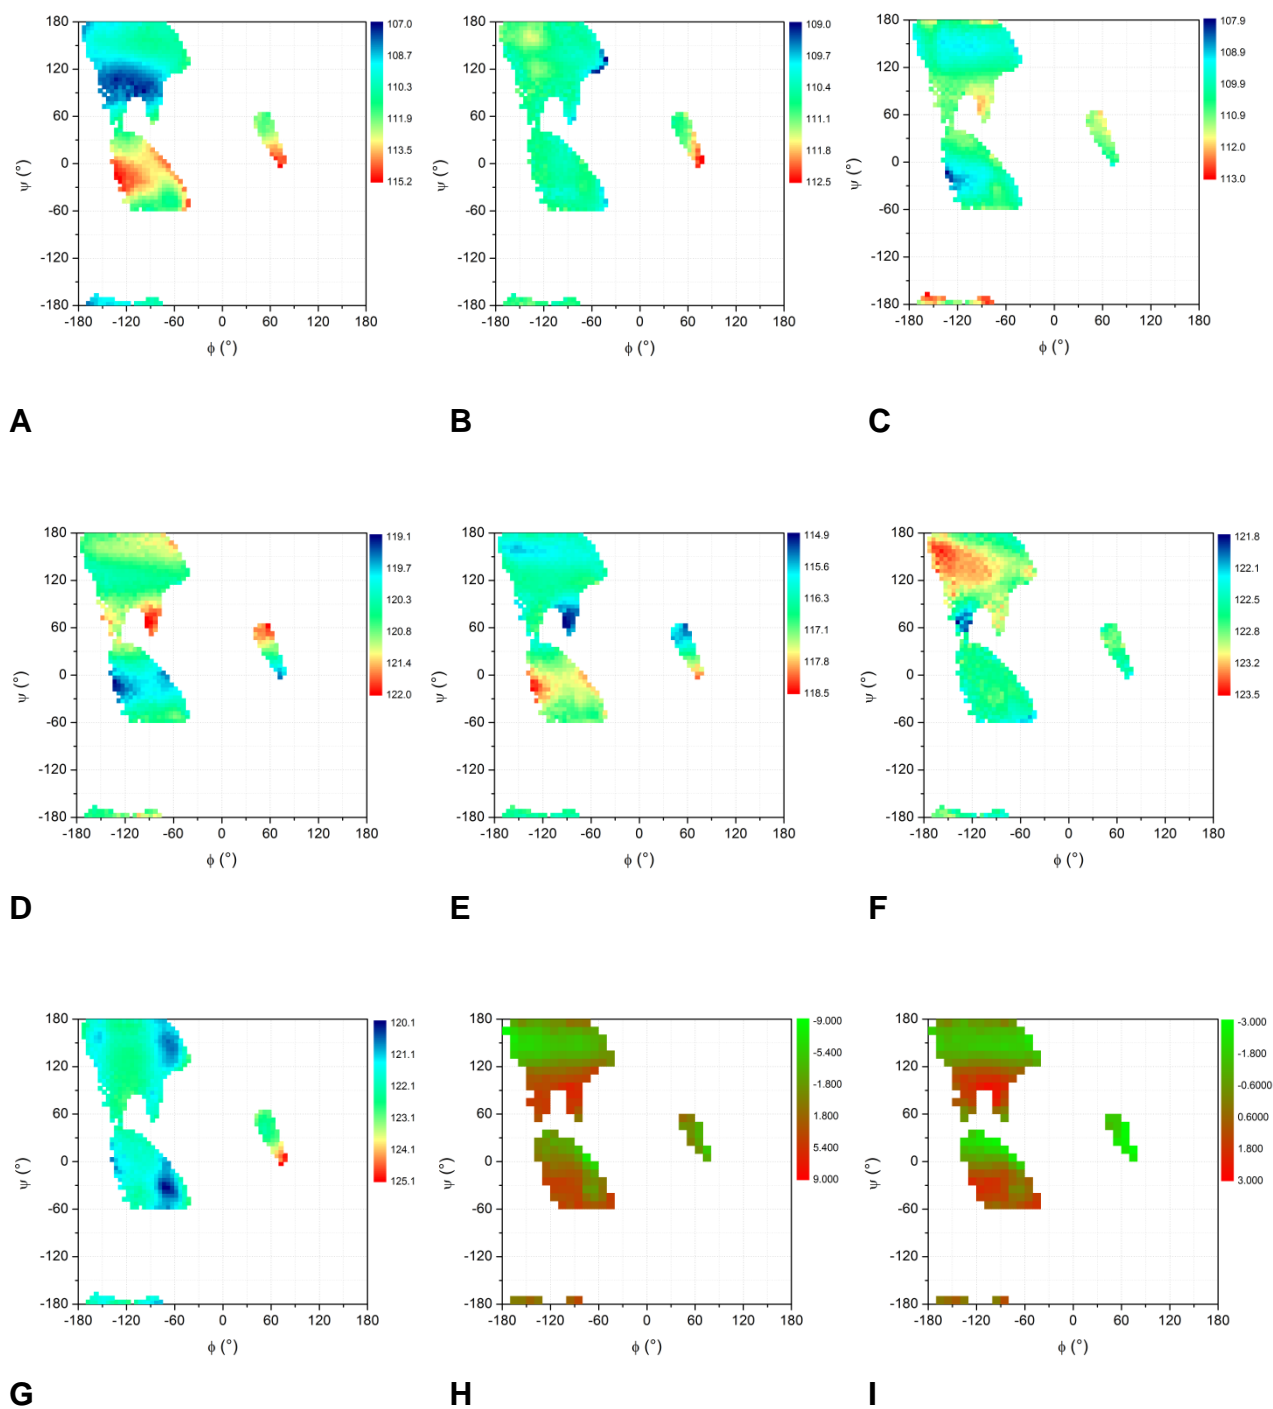

**Figure S1.** Ramachandran plots highlighting the experimental dependence of the bond angles  $NC^{\alpha}C^{\beta}$  (A),  $NC^{\alpha}C^{\beta}$  (B),  $C^{\beta}C^{\alpha}C$  (C),  $C^{\alpha}CO$  (D),  $C^{\alpha}CN^{+1}$  (E),  $OCN^{+1}$  (F),  $C^{-1}NC^{\alpha}$  (G) and dihedral angles  $\Delta\omega$  (H),  $\theta_C$  (I) on backbone conformation ( $\phi$ ,  $\psi$ ) for the eighteen non-Gly/non-Pro residues. The mean values are calculated in  $5^{\circ}\times 5^{\circ}$  and  $10^{\circ}\times 10^{\circ}$  ( $\phi$ ,  $\psi$ )-boxes for bond and dihedral angles, respectively. Only boxes containing at least 50 residues were considered.

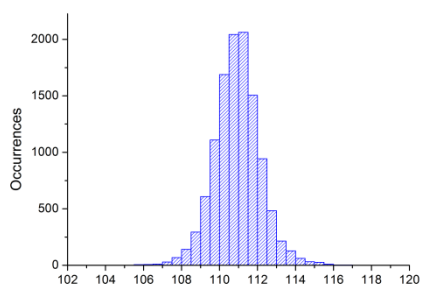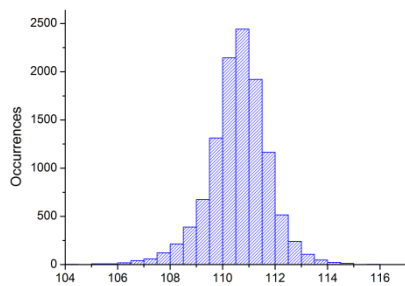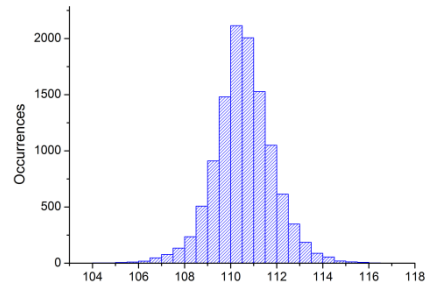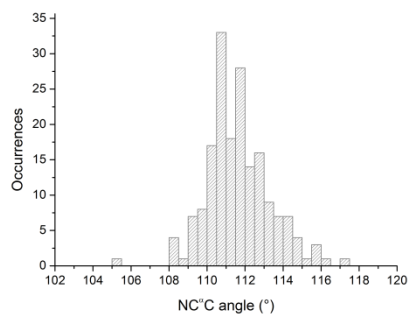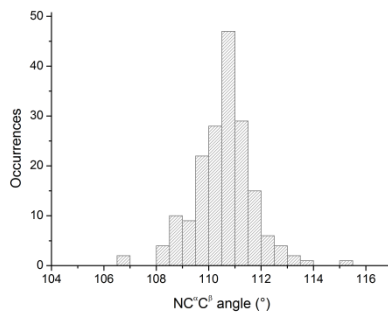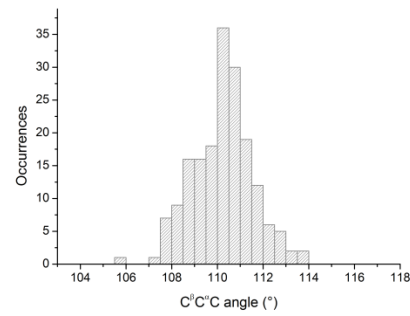

**A**

**B**

**C**

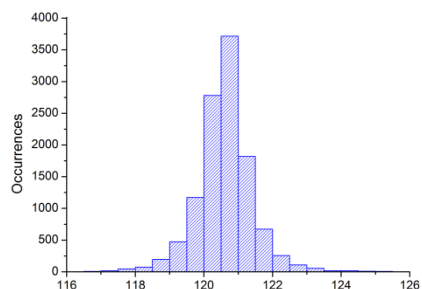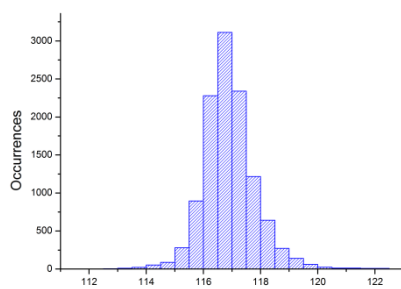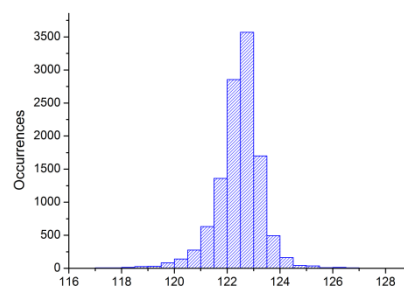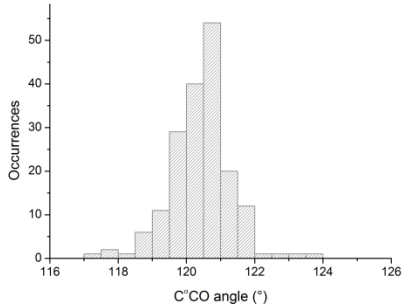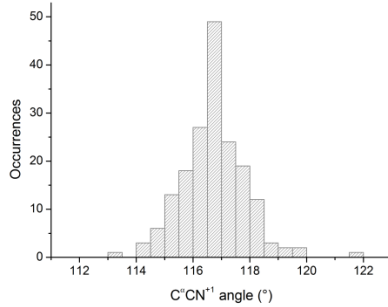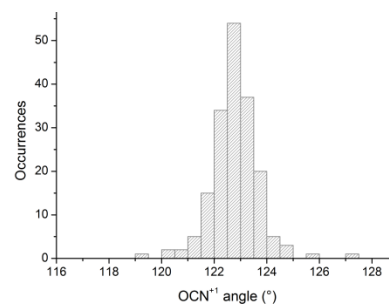

**D**

**E**

**F**

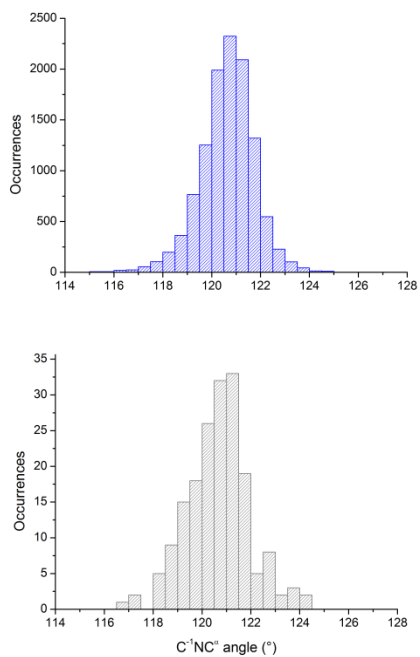

**G**

**Figure S2.** Distributions of bond angles values of non-Gly/non-Pro residues in  $\alpha$ -helix (blue) or coil (grey) in the  $3^\circ \times 3^\circ$ -box centered at  $(\phi, \psi) = (-63^\circ, -43^\circ)$ :  $NC^\alpha C$  (A),  $NC^\alpha C^\beta$  (B),  $C^\beta C^\alpha C$  (C),  $C^\alpha CO$  (D),  $C^\alpha CN^{+1}$  (E),  $OCN^{+1}$  (F),  $C^{-1}NC^\alpha$  (G).

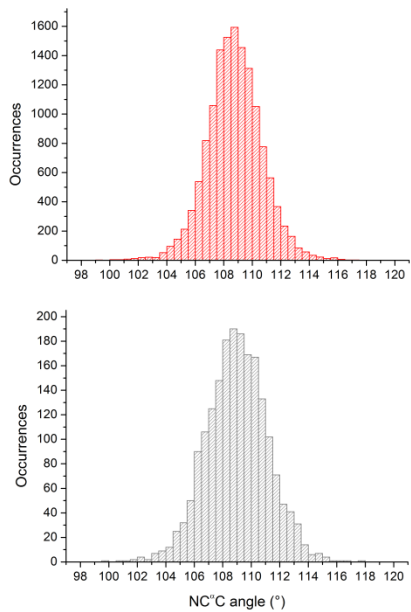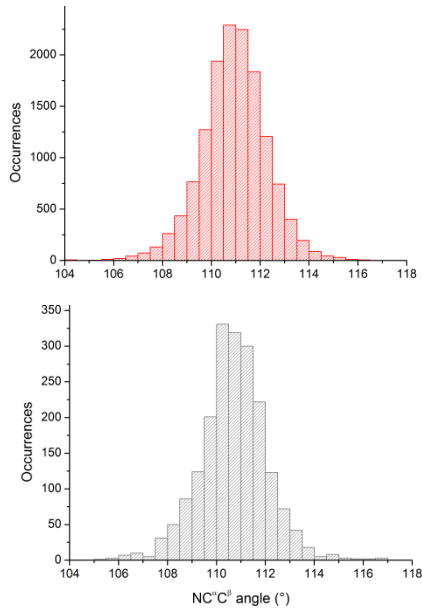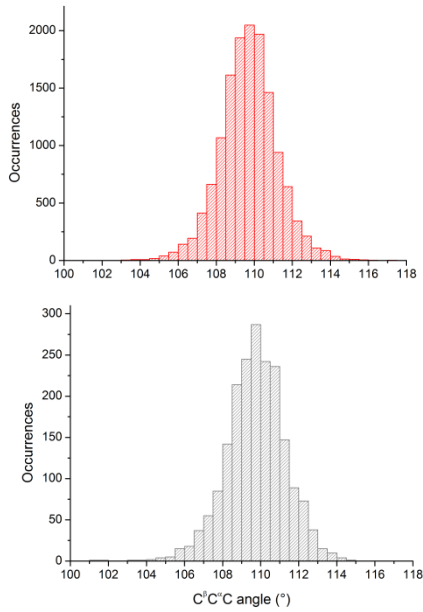

**A**

**B**

**C**

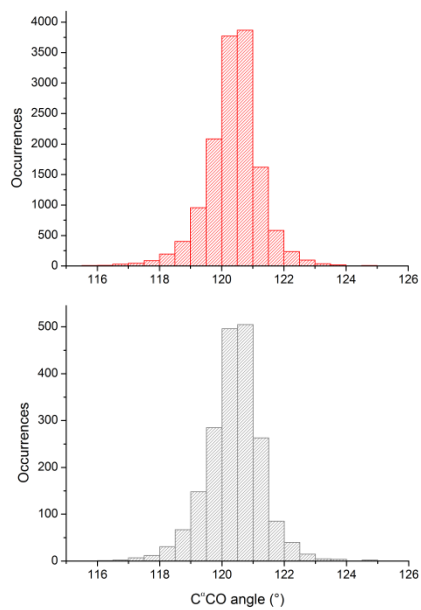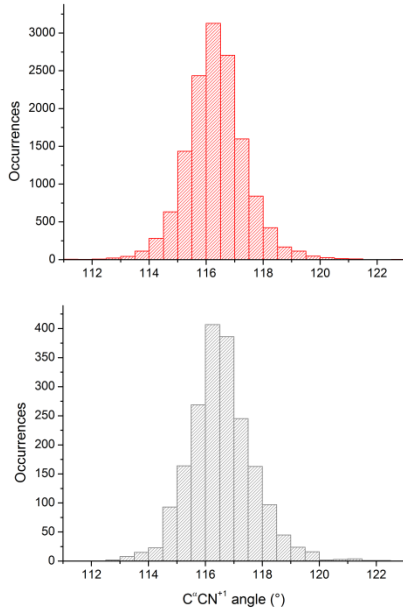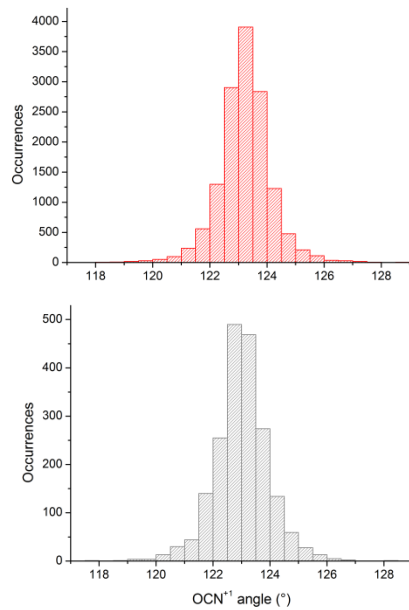

**D**

**E**

**F**

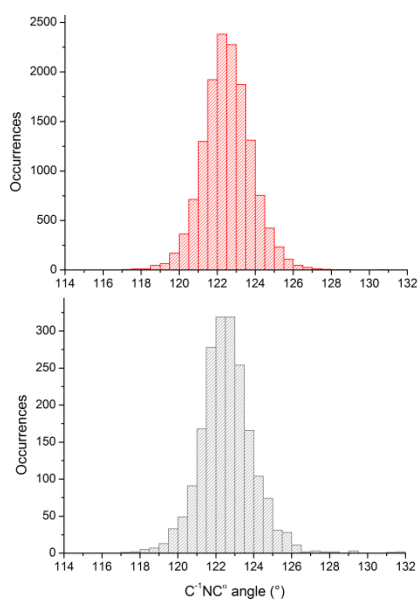

**G**

**Figure S3.** Distributions of bond angles values of non-Gly/non-Pro residues in  $\beta$ -sheet (red) or coil (grey) in the  $15^\circ \times 15^\circ$ -box centered at  $(\varphi, \psi) = (-120^\circ, 130^\circ)$ :  $\text{NC}^\alpha\text{C}$  (A),  $\text{NC}^\alpha\text{C}^\beta$  (B),  $\text{C}^\beta\text{C}^\alpha\text{C}$  (C),  $\text{C}^\alpha\text{CO}$  (D),  $\text{C}^\alpha\text{CN}^{+1}$  (E),  $\text{OCN}^{+1}$  (F),  $\text{C}^{-1}\text{NC}^\alpha$  (G).
